# Supplementary material
Source: publisher figshare collection journal article supplement (https://karger.figshare.com/ndownloader/files/16966643)
Supplement: Supplementary file 1 [file 16966643]

## **Supplementary Material**

### **Tofacitinib as Induction and Maintenance Therapy in Japanese**

#### **Patients with Active Ulcerative Colitis**

Yasuo Suzuki<sup>1</sup>, Mamoru Watanabe<sup>2</sup>, Toshiyuki Matsui<sup>3</sup>, Satoshi Motoya<sup>4</sup>, Tadakazu Hisamatsu<sup>5</sup>,  
Hirotoshi Yuasa<sup>6</sup>, Junichi Tabira<sup>6</sup>, Naoki Isogawa<sup>6</sup>, Shinichi Tsuchiwata<sup>6</sup>, Shoko Arai<sup>7</sup>, Toshifumi Hibi<sup>8</sup>

<sup>1</sup>Toho University, Sakura Medical Center, Chiba, Japan

<sup>2</sup>Department of Gastroenterology and Hepatology, Tokyo Medical and Dental University Hospital,  
Tokyo, Japan

<sup>3</sup>Department of Gastroenterology, Fukuoka University, Chikushi Hospital, Fukuoka, Japan

<sup>4</sup>IBD Center, Sapporo Kosei Hospital, Hokkaido, Japan

<sup>5</sup>Third Department of Internal Medicine, Kyorin University, Tokyo, Japan

<sup>6</sup>Global Product Development – JPN, Pfizer Japan Inc, Tokyo, Japan

<sup>7</sup>Pfizer Innovative Health – JPN, Pfizer Japan Inc, Tokyo, Japan

<sup>8</sup>Center for Inflammatory Bowel Disease, Kitasato University, Kitasato Institute Hospital, Japan

## Methods

### Eligibility

Patients in OCTAVE Induction 1 were  $\geq 18$  years of age, with an ulcerative colitis (UC) diagnosis for  $\geq 4$  months, and moderately to severely active disease (total Mayo score of  $\geq 6$ , rectal bleeding subscore of  $\geq 1$ , and endoscopic subscore of  $\geq 2$ ), based on centrally read Mayo endoscopic subscore.

### Prohibited Medications

The washout periods for tumor necrosis factor inhibitors and immunomodulators were 8 weeks and 2 weeks, respectively.

### Exclusion Criteria

Key exclusion criteria were: patients with indeterminate, microscopic, ischemic, or infectious colitis; patients with Crohn's disease; patients with UC limited to distal 15 cm of colon; and patients who had surgery for UC, or were likely to require surgery during the study. Patients with a history of lymphoma, lymphoproliferative disorders, or malignancies were excluded (except for adequately treated or excised non-metastatic basal cell or squamous cell skin cancer) [1].

## Reference

- 1 Sandborn WJ, Su C, Sands BE, D'Haens GR, Vermeire S, Schreiber S, Danese S, Feagan BG, Reinisch W, Niezychowski W, Friedman G, Lawendy N, Yu D, Woodworth D, Mukherjee A, Zhang H, Healey P, Panés J: Tofacitinib as induction and maintenance therapy for ulcerative colitis. *N Engl J Med* 2017;376:1723–1736.

## Tables

**Supplementary Table 1.** Definitions of endpoints based on Mayo score

|                       |                                                                                                                                                                           |
|-----------------------|---------------------------------------------------------------------------------------------------------------------------------------------------------------------------|
| Remission             | Total Mayo score $\leq 2$ , with no individual subscore $> 1$ , and a rectal bleeding subscore of 0                                                                       |
| Mucosal healing       | Mayo endoscopic subscore $\leq 1$                                                                                                                                         |
| Partial Mayo score    | Mayo score excluding endoscopic subscore                                                                                                                                  |
| Clinical response     | $\geq 30\%$ and $\geq 3$ -point decrease from induction study baseline total Mayo score, plus decrease in rectal bleeding subscore $\geq 1$ or absolute subscore $\leq 1$ |
| Endoscopic remission  | Mayo endoscopic subscore of 0                                                                                                                                             |
| Clinical remission    | Total Mayo score of $\leq 2$ points, with no individual subscore $> 1$                                                                                                    |
| Symptomatic remission | Total Mayo score of $\leq 2$ points with no individual subscore $> 1$ and both rectal bleeding and stool frequency subscore of 0                                          |
| Deep remission        | Total Mayo score of $\leq 2$ points, with no individual subscore $> 1$ , and endoscopic and rectal bleeding subscores of 0                                                |

|                                  |                                                                                                                                     |
|----------------------------------|-------------------------------------------------------------------------------------------------------------------------------------|
| Sustained steroid-free remission | Proportion of patients who achieve remission and are steroid-free for $\geq 4$ weeks prior to the visit at both week 24 and week 52 |
| Sustained remission              | Proportion of patients who achieve remission at both week 24 and week 52                                                            |
| Sustained mucosal healing        | Proportion of patients who achieve mucosal healing at both week 24 and week 52                                                      |

---

**Supplementary Table 2.** Country of enrollment for patients randomized in OCTAVE Induction 1 and OCTAVE Sustain

| Region/country, <i>n</i> (%) | OCTAVE Induction 1<br><i>N</i> = 614 | OCTAVE Sustain<br><i>N</i> = 593 |
|------------------------------|--------------------------------------|----------------------------------|
| Europe                       | 359 (58.5)                           | 346 (58.3)                       |
| Austria                      | 29 (4.7)                             | 13 (2.2)                         |
| Belgium                      | 50 (8.1)                             | 30 (5.1)                         |
| Croatia                      | 1 (0.2)                              | 1 (0.2)                          |
| Czech Republic               | 10 (1.6)                             | 7 (1.2)                          |
| Denmark                      | 8 (1.3)                              | 7 (1.2)                          |
| Estonia                      | 5 (0.8)                              | 4 (0.7)                          |
| France                       | 13 (2.1)                             | 19 (3.2)                         |
| Germany                      | 23 (3.7)                             | 25 (4.2)                         |
| Great Britain                | 15 (2.4)                             | 14 (2.4)                         |

|                 |          |          |
|-----------------|----------|----------|
| Hungary         | 9 (1.5)  | 23 (3.9) |
| Israel          | 3 (0.5)  | 7 (1.2)  |
| Italy           | 34 (5.5) | 22 (3.7) |
| Latvia          | 1 (0.2)  | 1 (0.2)  |
| The Netherlands | 2 (0.3)  | 14 (2.4) |
| Poland          | 22 (3.6) | 40 (6.7) |
| Romania         | 9 (1.5)  | 6 (1.0)  |
| Russia          | 23 (3.7) | 19 (3.2) |
| Serbia          | 34 (5.5) | 20 (3.4) |
| Slovakia        | 9 (1.5)  | 26 (4.4) |
| Spain           | 20 (3.3) | 9 (1.5)  |
| Ukraine         | 39 (6.4) | 39 (6.6) |

|               |            |            |
|---------------|------------|------------|
| North America | 143 (23.3) | 128 (21.6) |
| Canada        | 23 (3.7)   | 14 (2.4)   |
| USA           | 120 (19.5) | 114 (19.2) |
| Other         | 112 (18.2) | 119 (20.1) |
| Australia     | 12 (2.0)   | 15 (2.5)   |
| Brazil        | 0 (0.0)    | 1 (0.2)    |
| Colombia      | 1 (0.2)    | 1 (0.2)    |
| Japan         | 65 (10.6)  | 39 (6.6)   |
| Korea         | 0 (0.0)    | 23 (3.9)   |
| New Zealand   | 19 (3.1)   | 17 (2.9)   |
| South Africa  | 15 (2.4)   | 22 (3.7)   |
| Taiwan        | 0 (0.0)    | 1 (0.2)    |

---

*N*, number of randomized patients; *n*, number of patients in the specified category.

## Figures

**Supplementary Fig. 1.** Japanese patient flow during (A) OCTAVE Induction 1 and (B) OCTAVE Sustain

### A. OCTAVE Induction 1

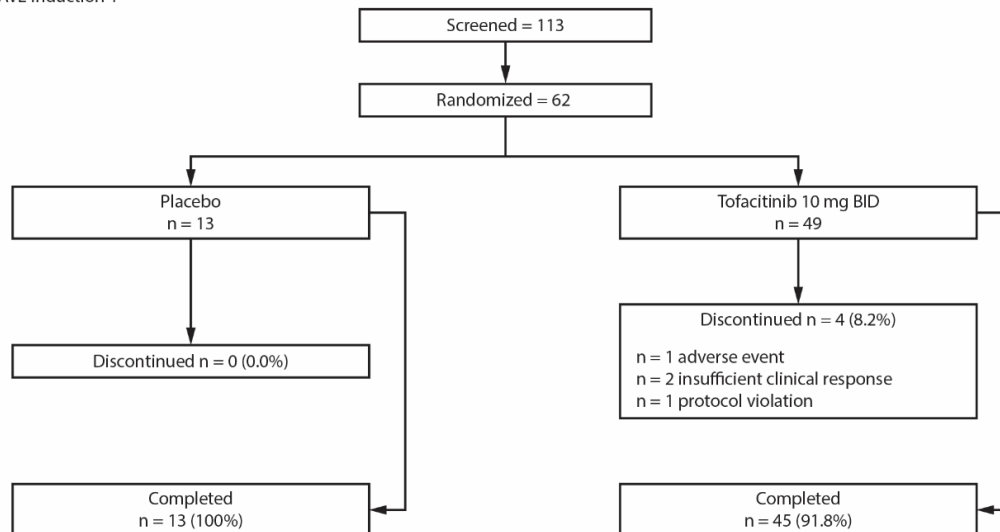

### B. OCTAVE Sustain

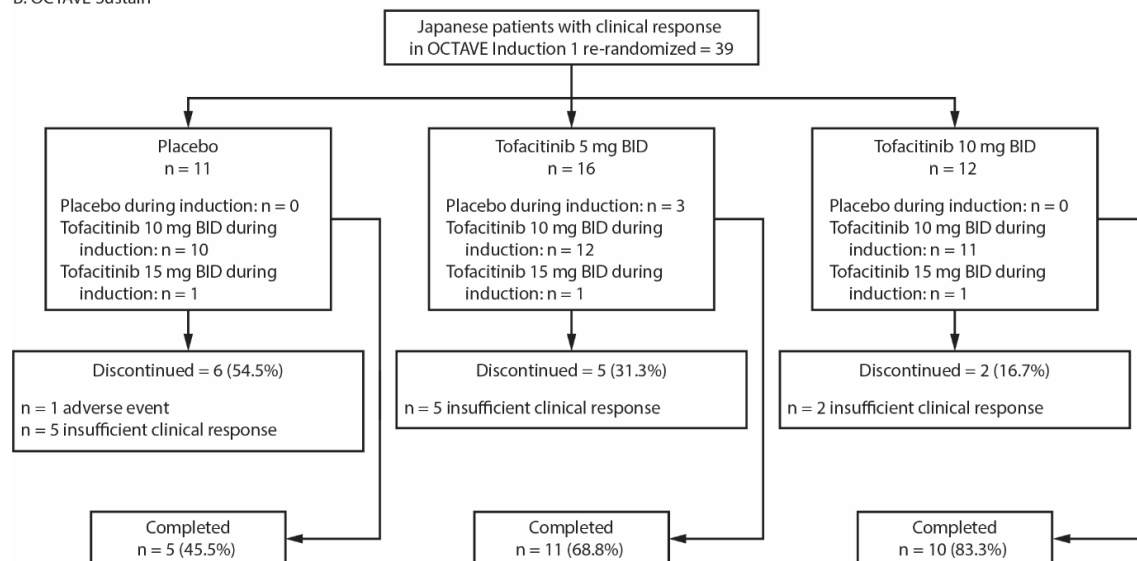

BID, twice daily; *n*, number of patients in the specified category.



**Supplementary Fig. 2.** Proportion of Japanese patients achieving (A) sustained steroid-free remission, (B) sustained remission, and (C) sustained mucosal healing at week 52 (OCTAVE Sustain), by treatment group

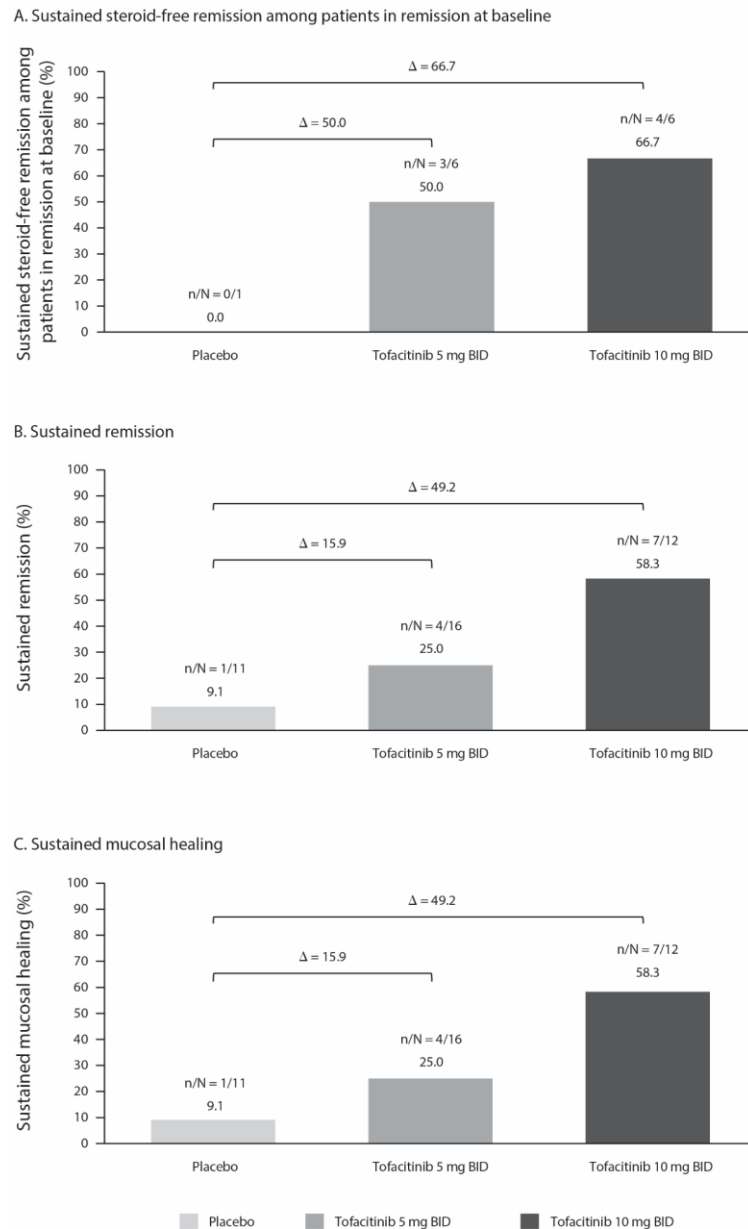

$\Delta$ , treatment difference; BID, twice daily; N, number of evaluable patients in each subgroup; n, number of patients with response.

**Supplementary Fig. 3.** Proportion of Japanese patients achieving (A) remission, (B) mucosal healing, and (C) clinical response at week 8 (OCTAVE Induction 1) and week 52 (OCTAVE Sustain), by treatment group

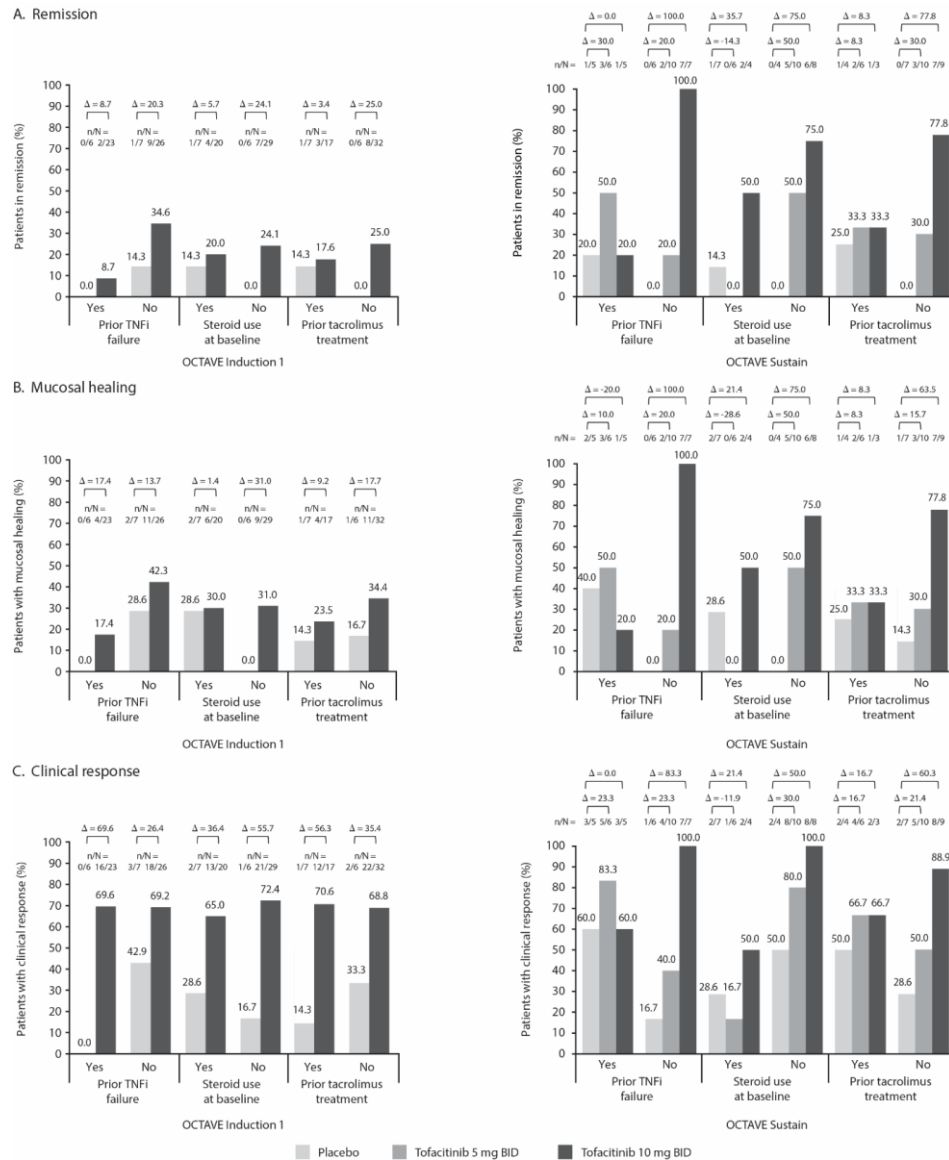

Data are full analysis set with non-responder imputation, central read.  $\Delta$ , treatment difference; BID, twice daily;  $N$ , number of evaluable patients in each subgroup;  $n$ , number of patients with response; TNFi, tumor necrosis factor inhibitor.

**Supplementary Fig. 4.** Exposure-response modeling of the proportion of Japanese patients achieving remission compared with all data at week 8 of OCTAVE Induction 1

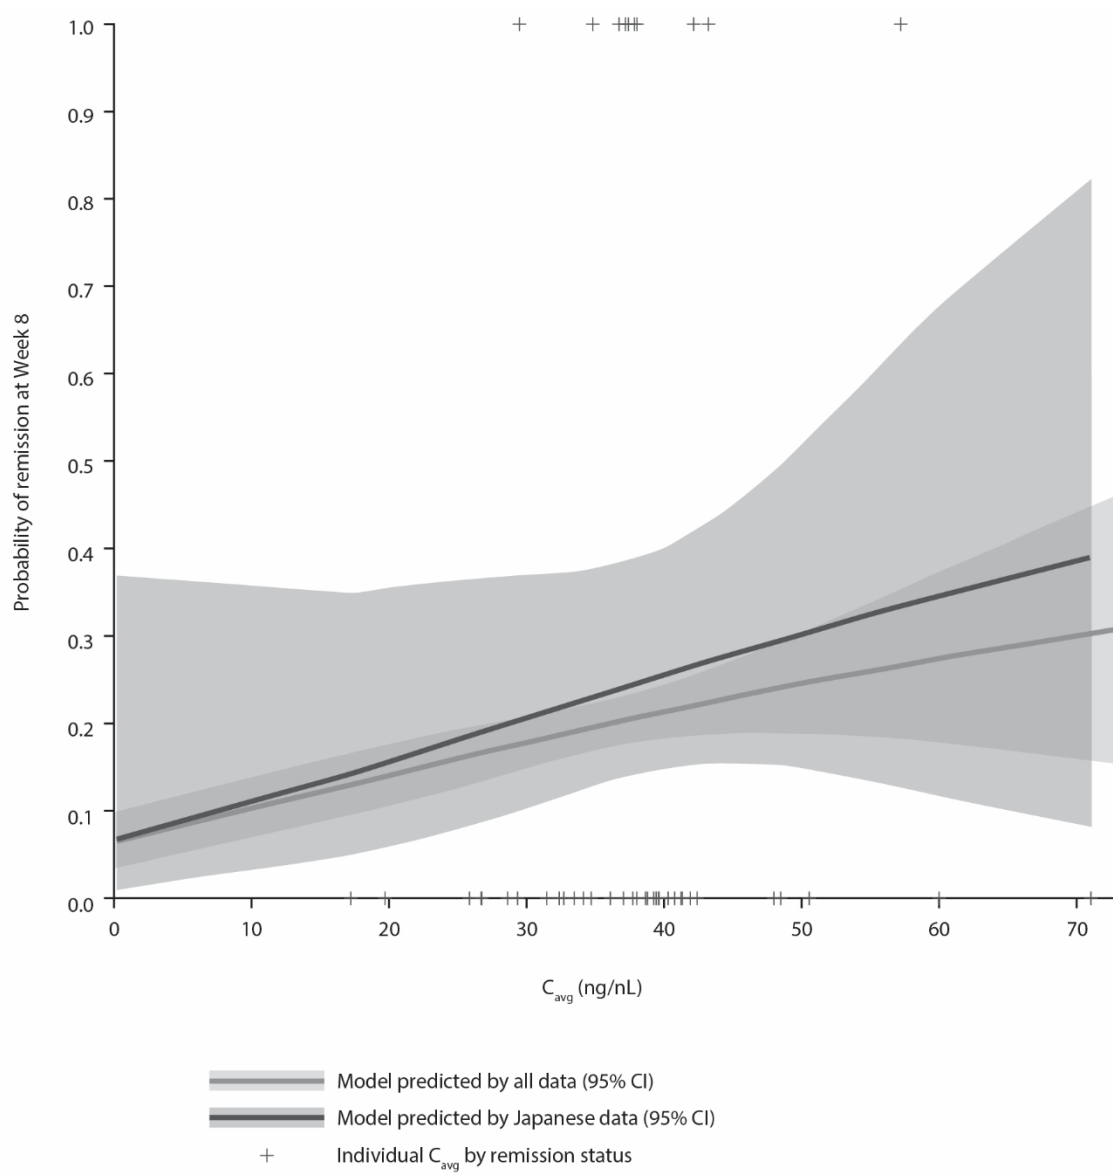

$C_{avg}$ , average concentration; CI, confidence interval.
